# Supplementary material for: Polymorphisms in MICA, but not in DEPDC5, HCP5 or PNPLA3, are associated with chronic hepatitis C-related hepatocellular carcinoma
Source: PubMed Central journal article supplement (PMC5605683; doi:10.1038/s41598-017-10363-5), 2017-09-19
Supplement: 41598_2017_10363_MOESM1_ESM.pdf [file 41598_2017_10363_MOESM1_ESM.pdf]

**Polymorphisms in *MICA*, but not in *DEPDC5*, *HCP5* or *PNPLA3*, are associated with chronic hepatitis C-related hepatocellular carcinoma**

Hoang Hai, Akihiro Tamori\*, Le Thi Thanh Thuy, Kanako Yoshida, Atsushi Hagihara, Etsushi Kawamura, Sawako Uchida-Kobayashi, Hiroyasu Morikawa, Masaru Enomoto, Yoshiki Murakami, Norifumi Kawada

Department of Hepatology, Osaka City University Graduate School of Medicine, Osaka, Japan

**\*Corresponding author**

Akihiro Tamori, MD & PhD

Department of Hepatology, Osaka City University Graduate School of Medicine  
1-4-3, Asahimachi, Abenoku, Osaka 545-8585, Japan.

Tel: +81-6-6645-3905

Fax: +81-6-6646-1433

E-mail: [atamori@med.osaka-cu.ac.jp](mailto:atamori@med.osaka-cu.ac.jp)

Supplementary Table S1. Clinical characteristics of patients in the validation cohort

| Parameter                         | HCC<br>(n = 115) | Non-HCC<br>(n = 523) | <i>p</i> -value |
|-----------------------------------|------------------|----------------------|-----------------|
| Age (years)                       | 70 ± 8           | 60 ± 13              | <0.0001         |
| Sex (female/male)                 | 42/73            | 288/235              | 0.0004          |
| HCV viral load (log copies/mL)    | 6.0 ± 0.8        | 6.0 ± 1.0            | 0.5151          |
| CH/LC                             | 47/62            | 479/44               | <0.0001         |
| AST (IU/L)                        | 73 ± 49          | 56 ± 56              | <0.0001         |
| ALT (IU/L)                        | 58 ± 36          | 58 ± 59              | 0.0192          |
| Platelets (×10 <sup>4</sup> /μL)  | 11.5 ± 5.0       | 17.9 ± 7.1           | <0.0001         |
| Albumin (g/dL)                    | 4.2 ± 6.9        | 4.2 ± 3.1            | <0.0001         |
| PT%                               | 84 ± 15          | 95 ± 18              | <0.0001         |
| AFP (ng/mL)                       | 2770 ± 14985     | 25 ± 284             | <0.0001         |
| PIVKA-II (mAU/mL)                 | 3062 ± 21595     | 595 ± 7445           | <0.0001         |
| <i>IL28B</i> rs8099917 (TT/TG/GG) | 82/31/1          | 360/143/8            | 0.5770          |
| <i>ITPA</i> rs1127354 (CC/CA/AA)  | 59/31/3          | 315/105/4            | 0.1139          |

Supplementary Table S2. Characteristics of patients available for sMICA level

| Parameter                       | All patients<br>(n = 36) | HCC<br>(n = 18) | Non-HCC<br>(n = 18) |
|---------------------------------|--------------------------|-----------------|---------------------|
| Age (years)                     | 61 ± 11                  | 63 ± 9          | 59 ± 13             |
| Gender (female/male)            | 15/21                    | 2/16            | 13/5                |
| CH/LC                           | 18/18                    | 9/9             | 9/9                 |
| HCV RNA (log copies/mL)         | 5.9 ± 1.4                | 6.2 ± 1.4       | 5.7 ± 1.4           |
| AST (IU/L)                      | 64.1 ± 63.3              | 74.4 ± 70.7     | 53.9 ± 53.0         |
| ALT (IU/L)                      | 58.2 ± 48.5              | 64.7 ± 34.3     | 51.6 ± 58.7         |
| Plt (×10 <sup>4</sup> /μL)      | 13.1 ± 5.4               | 12.0 ± 4.0      | 14.3 ± 6.3          |
| Alb (g/dL)                      | 4.1 ± 0.5                | 4.0 ± 0.5       | 4.2 ± 0.5           |
| PT%                             | 95.8 ± 21.8              | 93.3 ± 20.7     | 99.0 ± 22.9         |
| AFP (ng/mL)                     | 50.1 ± 101.4             | 80.9 ± 128.4    | 15.4 ± 32.5         |
| PIVKA- II (mAU/mL)              | 1060.2 ± 4622.0          | 1864.8 ± 6041.4 | 25.8 ± 21.2         |
| <i>MICA</i> genotype (MA/HE/MI) | 12/12/12                 | 6/6/6           | 6/6/6               |

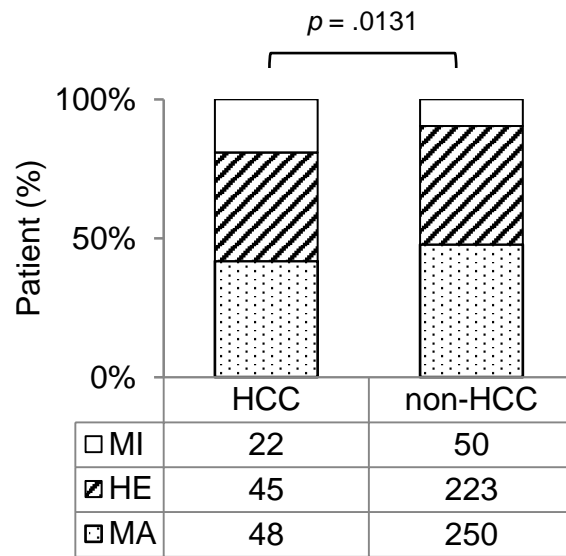

Supplementary Figure S1. Genotypes of *MICA* in CHC patients with or without HCC in the validation cohort. The vertical axis shows the percentage of each genotype, and the data table shows the number of samples tested in each group.
